# Supplementary material for: Aluminum soap nanoparticles-lignin powder form phase-selective gelator: synergistic adsorption and gelation for rapid oil spill recovery
Source: Research Square preprint supplement (doi:10.21203/rs.3.rs-2718489/v1), 2023-03-28
Supplement: Supplementary file 1 [file 0e8b2d4dba4d32b6cc22b442.docx]

**Supplementary Information**

**Aluminum soap nanoparticles-lignin powder form phase-selective gelator: synergistic adsorption and gelation for rapid oil spill recovery**

Suwan Cui 1, 2, Bohao Qi 1, 2, Hao Liu 1, 2, Xiaojun Sun 1, 2, Rui He 3, Junshuai Lian 3, Yiming Li 1, 2, Jinren Lu 2*, Mutai Bao 1, 2*

*1 Frontiers Science Center for Deep Ocean Multispheres and Earth System, and Key Laboratory of Marine Chemistry Theory and Technology, Ministry of Education, Ocean University of China, Qingdao 266100, China*

*2 College of Chemistry & Chemical Engineering, Ocean University of China, Qingdao 266100, China*

*3 Qingdao Guangming Environmental Technology Ltd, Qingdao 266071, China*

*Corresponding Authors: Mutai Bao ([mtbao@ouc.edu.cn](mailto:mtbao@ouc.edu.cn)), Jinren Lu ([lujr@ouc.edu.cn](mailto:lujr@ouc.edu.cn))

Corresponding address: College of Chemistry and Chemical Engineering, Ocean University of China, Songling Road 238, Qingdao 266100, Shandong Province, China.’

Table S1 Gelation ability of Al HSA with various solvents

| Solvent | State |
| --- | --- |
| Diesel oil | G |
| Kerosene | G |
| Silicon oil | PG |
| Toluene | G |
| Cyclohexane | G |
| Tetradecane | G |
| heptane | G |
| Ethyl acetate | I |
| Ethanol | I |
| Isopropanol | G |
| Dimethyl Sulfoxide | I |
| Hexadecane | G |
| G=Gel; I=Insoluble; PG=partial gel (thick material that did not stick on the top of the upon inversion). Gels were studied by a typical “test tube inversion method” after ~5 min of sample preparation (Raju et al. 2022). | |

We compared the performance differences between Al HSA and aluminum stearate. The gelation characteristics of aluminum stearate are shown in Fig. S1a, the phenomenon of dye adsorption was not observed in diesel and kerosene. Both Al HSA and SA diesel gel had textures similar to soaps (Fig. S1b). Interestingly, after diesel was mixed with 12-hydroxystearic acid (HSA) and stearic acid (SA), respectively, for 1 h. It was observed that SA was still in flowing state in diesel, while HSA gradually made diesel congeal (Fig. S1c, d). Silicone oil could not be congealed, indicating that aluminum soaps could only solidify hydrocarbons (Fig. S1e).


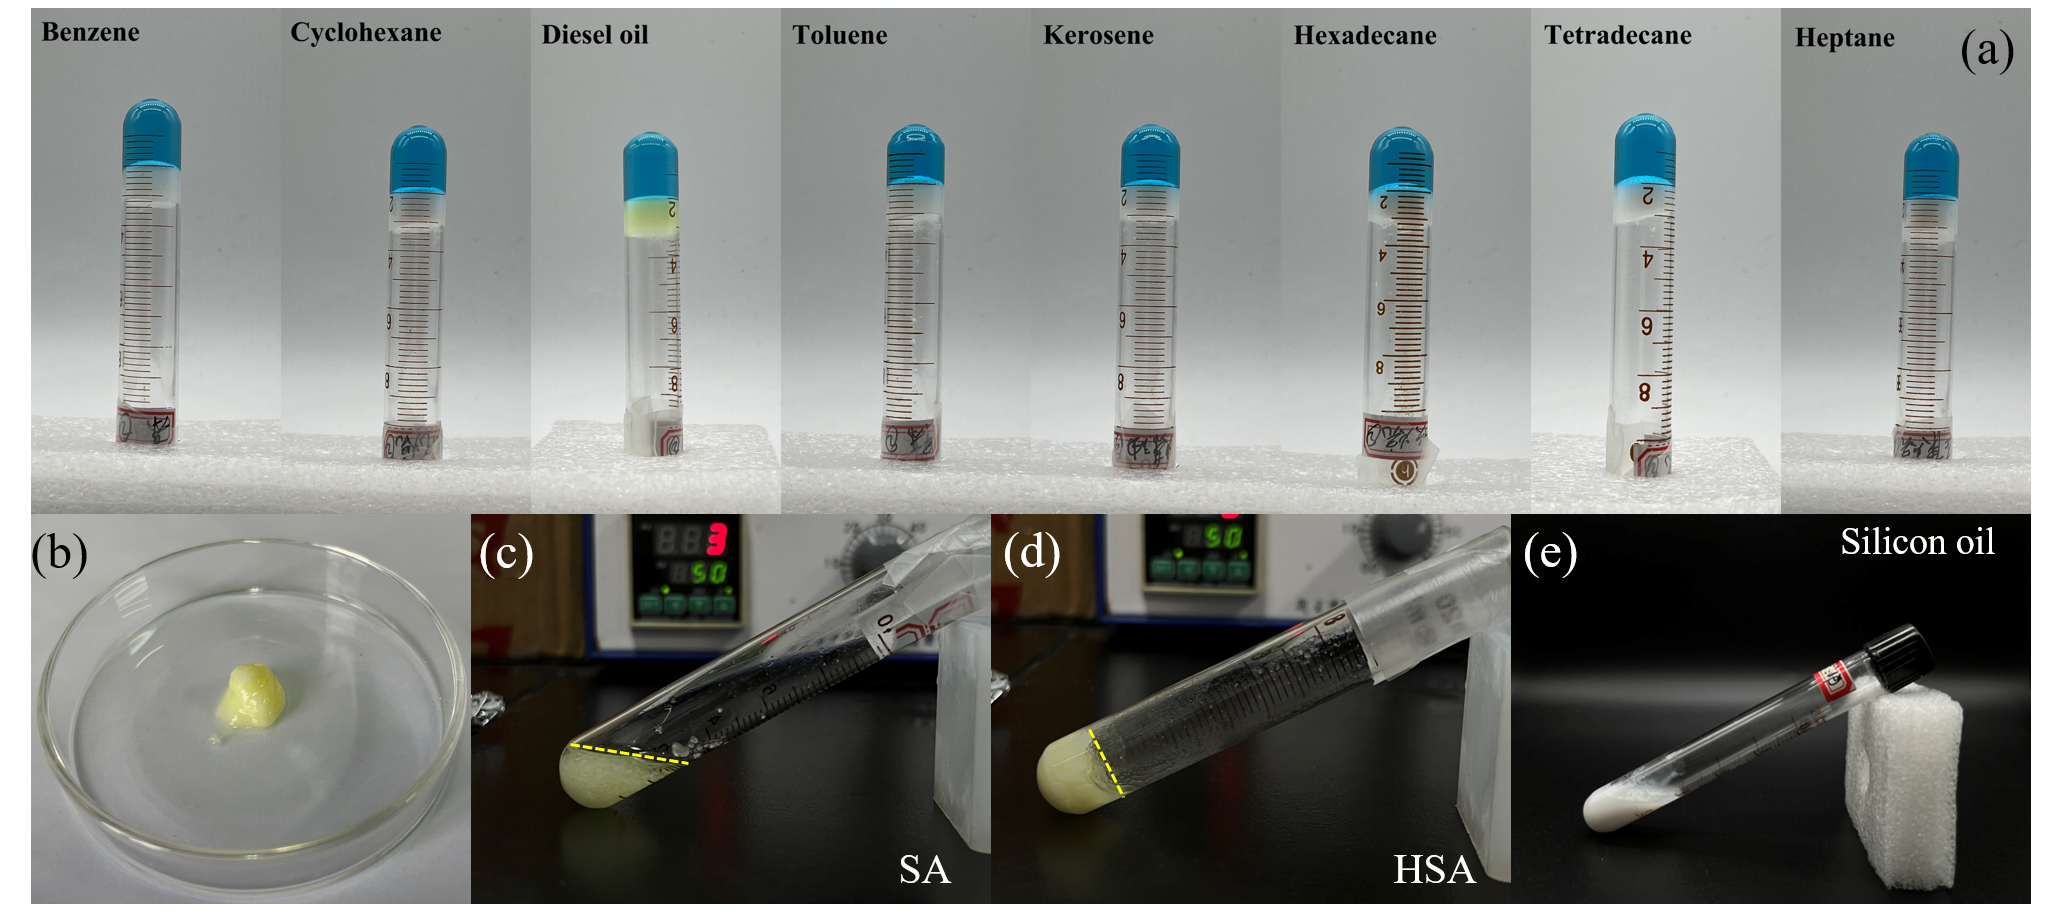


Fig. S1 a Photographs of aluminum stearate gelation of benzene, cyclohexane, diesel oil, toluene, kerosene, hexadecane, tetradecane, and heptane in the presence of water (stained with methylene blue, top) at room temperature. b Aluminum stearate diesel gel. c, d Diesel mixed with HSA and SA. e Silicone oil mixed with aluminum stearate.


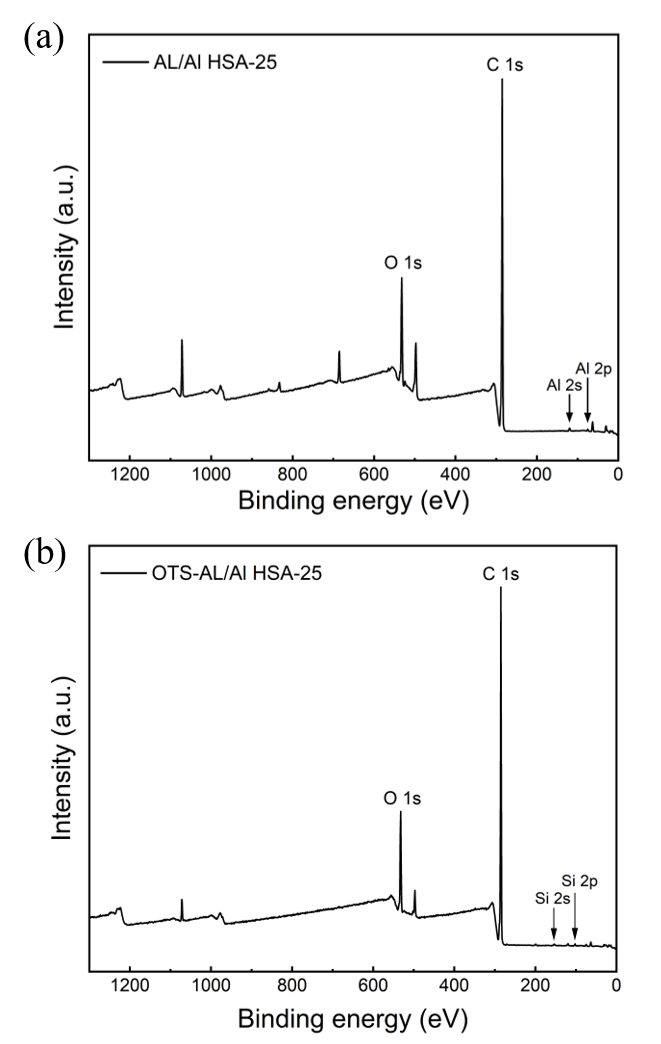


Fig. S2 Full spectra of a AL/Al HSA-25 and b OTS-AL/Al HSA-25.


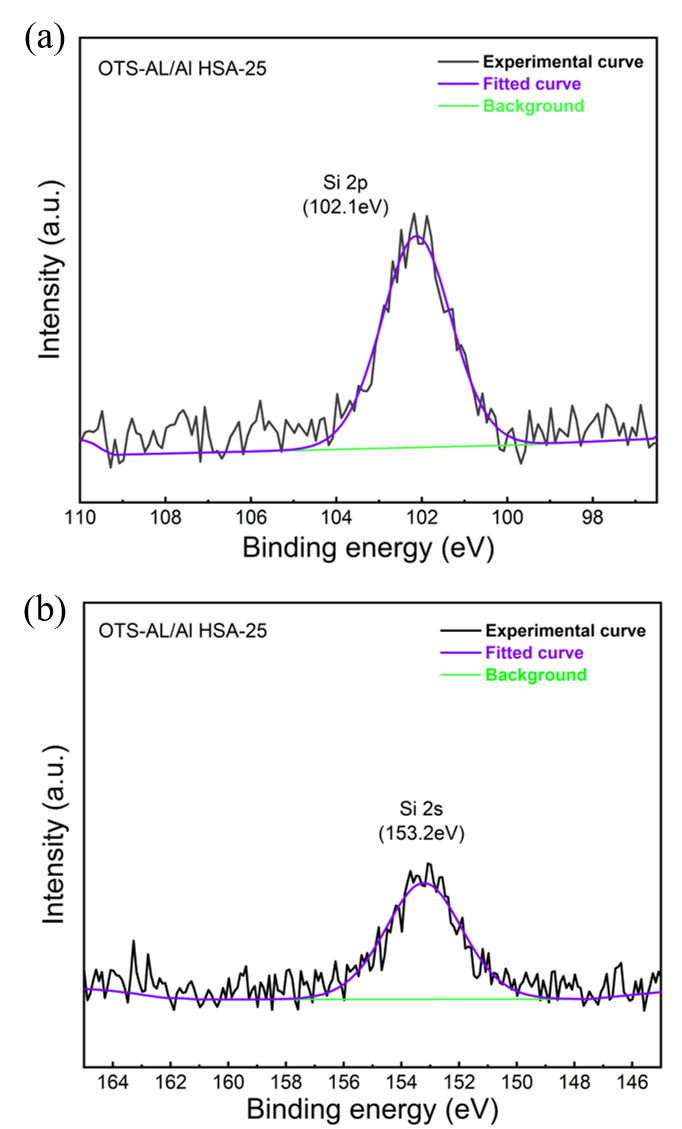


Fig. S3 High resolution a Si 2p and b Si 2s.


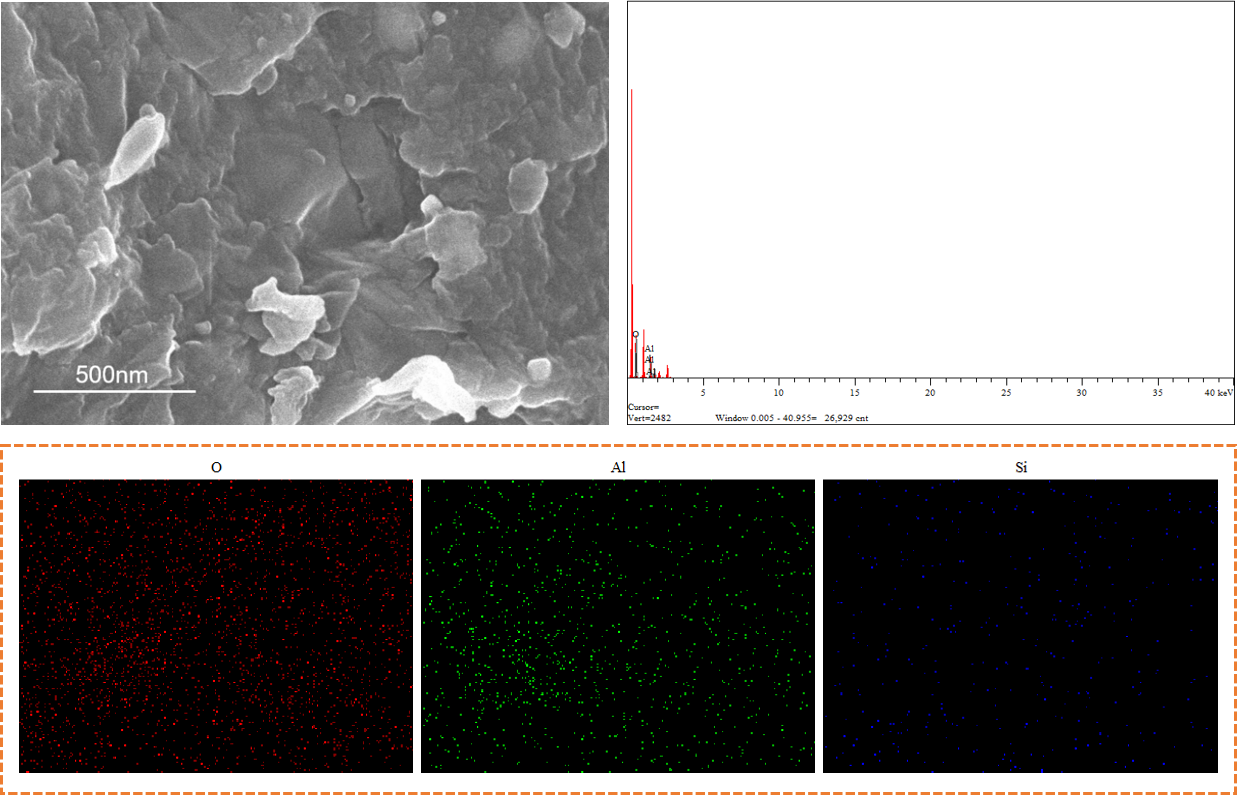


Fig. S4 SEM-EDS mapping images of OTS-AL/Al HSA-25.

**Table S2** Surface element concentration of O, Al, Si.

| Elt. | Line | Intensity (c/s) | Conc | Units | Error  2-sig | MDL  3-sig |  |
| --- | --- | --- | --- | --- | --- | --- | --- |
| O | Ka | 45.76 | 68.802 | wt.% | 2.799 | 1.483 |  |
| Al | Ka | 23.03 | 20.061 | wt.% | 1.277 | 1.044 |  |
| Si | Ka | 11.13 | 11.137 | wt.% | 1.151 | 1.166 |  |
|  |  |  | 100.000 | wt.% |  |  | Total |

According to SEM images, the morphologies of AL/Al HSA-25 were almost unchanged before and after OTS modification (Fig. S5), but the pore distribution of AL/Al HSA-45 was slightly reduced (Fig. S6).

**
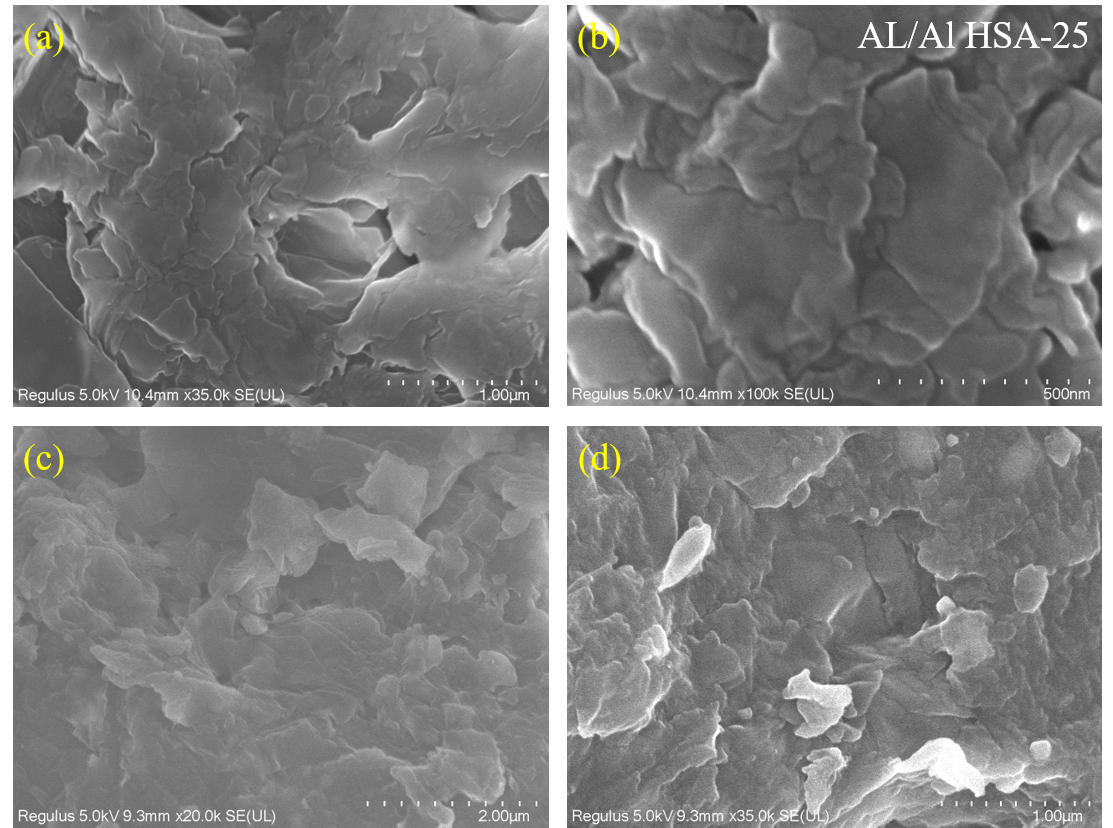
**

Fig. S5 SEM images of aluminum soap-lignin gelator with ECH 25wt%: a, b Before modification by OTS. c, d After modification by OTS.

**
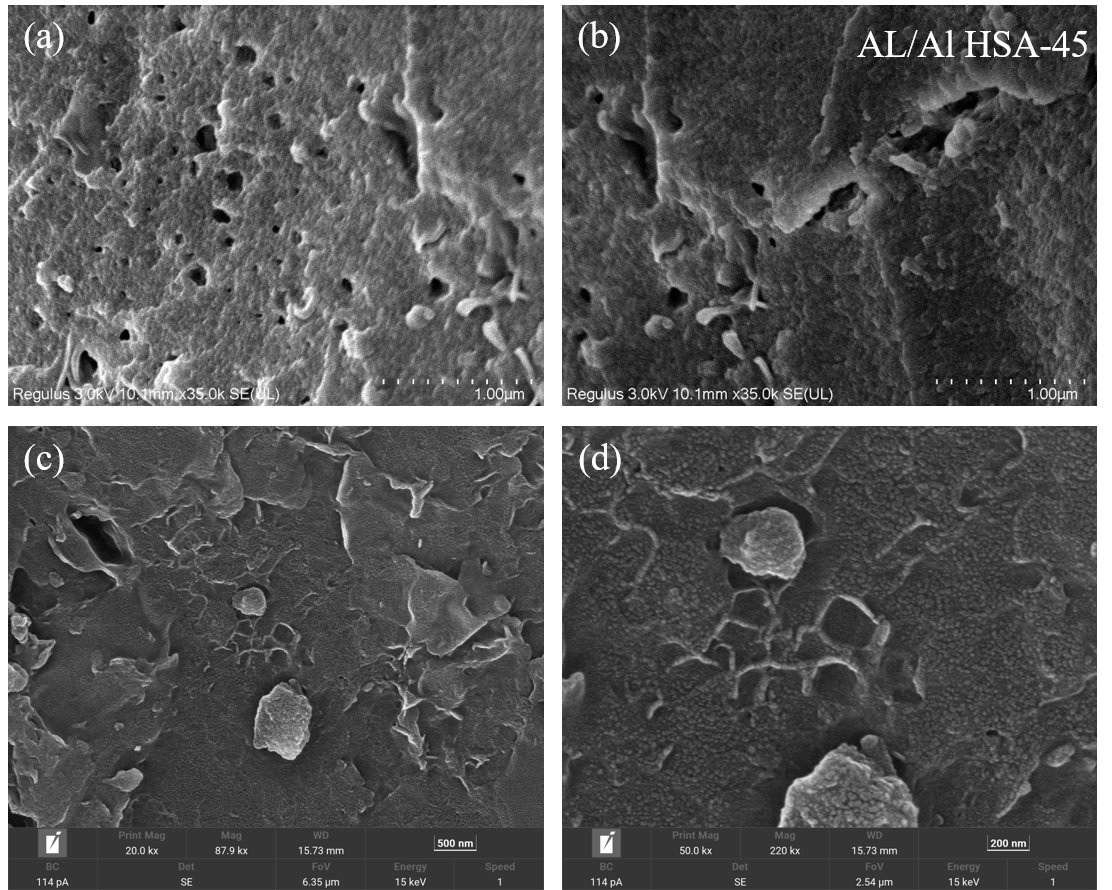
**

Fig. S6 SEM images of aluminum soap-lignin gelator with ECH 45wt%: a, b Before modification by OTS. c, d After modification by OTS.

Through BET-specific surface area tests, it was found that the specific surface areas of OTS-AL/Al HSA-25 and OTS-AL/Al HSA-45 were 5.240 m2/g and 6.319 m2/g, respectively.


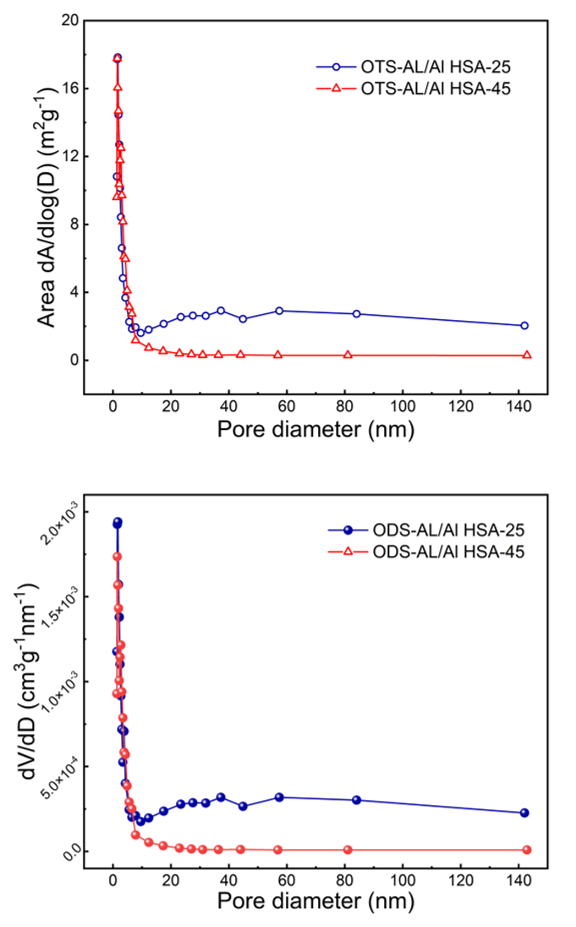


Fig. S7 BET data of OTS-AL/Al HSA-25 and OTS-AL/Al HSA-45.


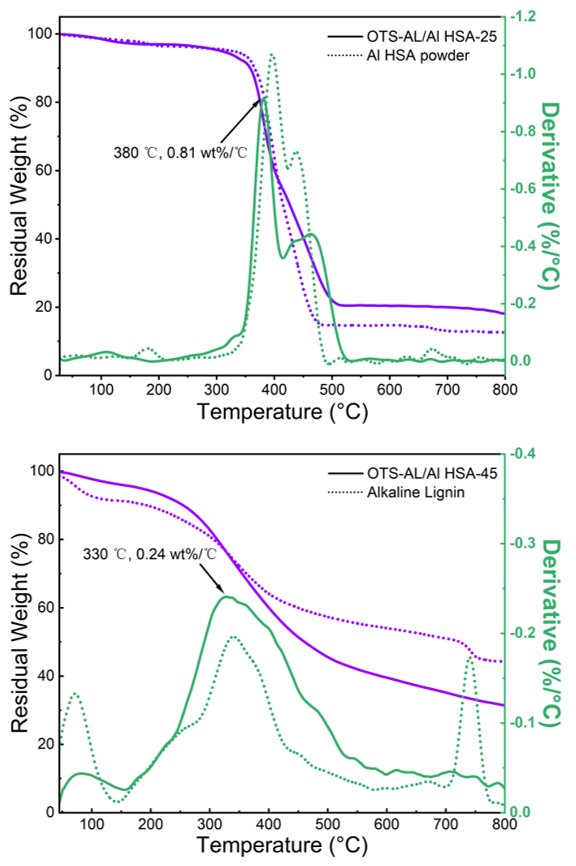


Fig. S8 DTG data of OTS-AL/Al HSA-25, OTS-AL/Al HSA-45, Al HSA, lignin.

The zebrafish were exposed to 400 mL water containing 0.05g OTS-AL/Al HSA-25 for 44 days (Fig. S9) and the growth of the fish was not affected (Zhang et al. 2020). The white filter paper was wrapped with oil gelator, the yellow substance was the feed, and the mobile phone recorded the shooting date.


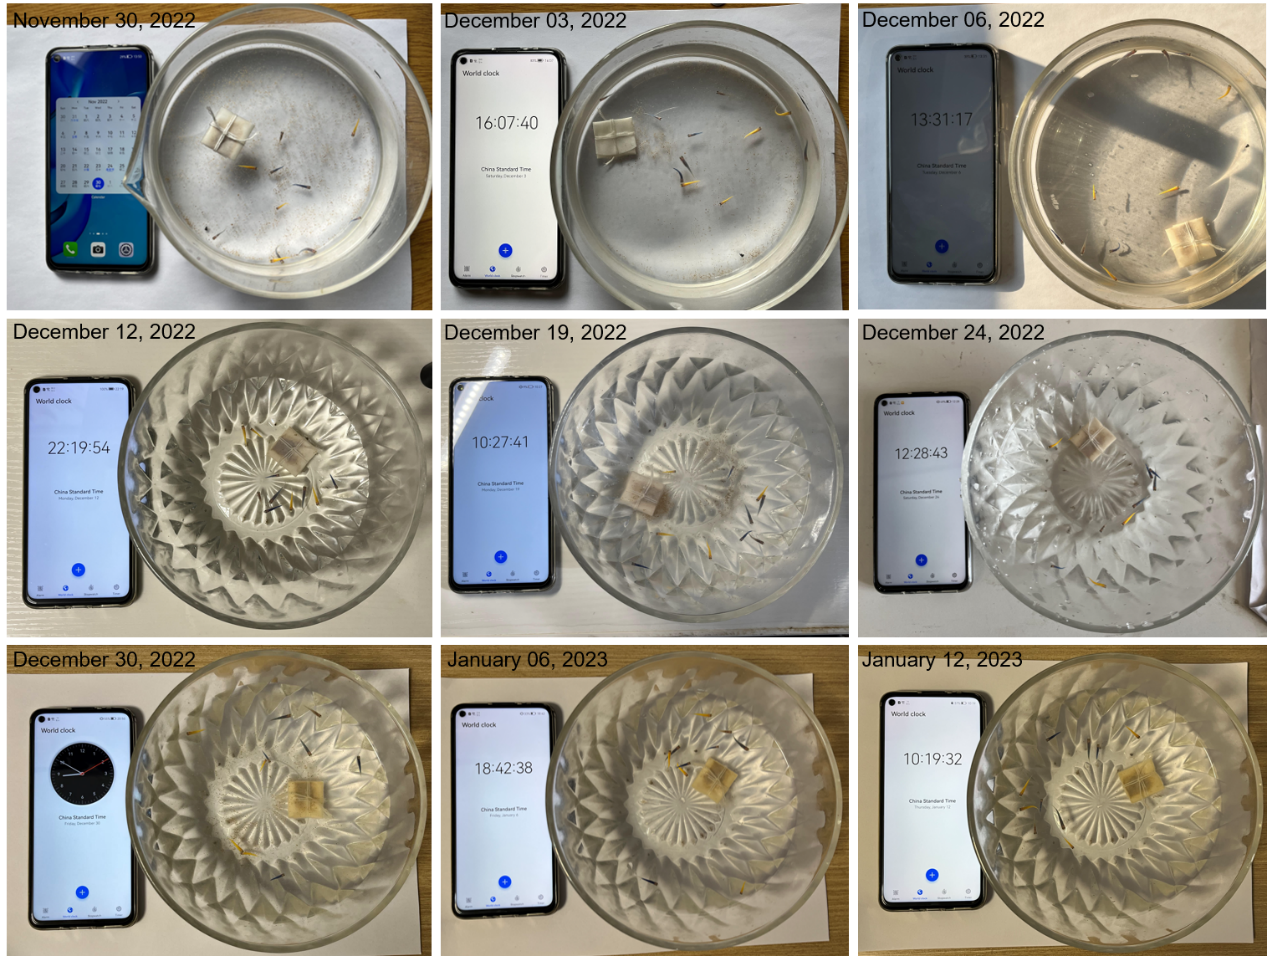


Fig. S9 The acute aquatic toxicity study with zebrafish.

# References

Raju C, Mathew LA, Sureshan KM (2022) A Biomaterial‐Based Porous Core–Shell Sorbent for Practical and Efficient Marine Oil Spill Recovery. Advanced Sustainable Systems 6: 2100521.

Zhang B, Chen S, Luo H et al (2020) Porous amorphous powder form phase-selective organogelator for rapid recovery of leaked aromatics and spilled oils. J Hazard Mater 384: 121460.
